# Supplementary material for: Gateways to the FANTOM5 promoter level mammalian expression atlas
Source: PubMed Central journal article supplement (PMC4310165; doi:10.1186/s13059-014-0560-6), 2015-01-05
Supplement: 13059_2014_560_MOESM4_ESM.pdf [file 13059_2014_560_MOESM4_ESM.pdf]

(A) **Curated sample name**

Smooth Muscle Cells – Aortic, donor0

**CAGE  
library ID**

**RNA  
ID**

**Genome assembly  
and data type**

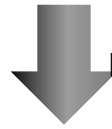

percent encoding

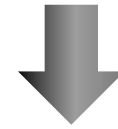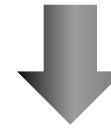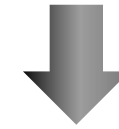

Smooth%20Muscle%20Cells%20-%20Aortic%2c%20donor0.CNhs10838.11210-116A4.hg19.ctss.bed.gz

(B)

```
R> SAMPLE_NAME = "Smooth%20Muscle%20Cells%20-%20Aortic%2c%20donor0.CNhs10838.11210-116A4.hg19.ctss.bed.gz"
```

```
R> URLdecode( strsplit(SAMPLE_NAME,"\\.")[1][1] )
```

```
[1] "Smooth Muscle Cells – Aortic, donor0"
```
