# Supplementary material for: Gateways to the FANTOM5 promoter level mammalian expression atlas
Source: Springer Nature journal article supplement (doi:10.1186/s13059-014-0560-6), 2015-01-05
Supplement: 13059_2014_560_MOESM6_ESM.pdf [file 13059_2014_560_MOESM6_ESM.pdf]

FF:11224-116B9

Name: CD14+ Monocytes, donor1  
 Species: Human (Homo sapiens)  
 Library ID: CNhs10852  
 Sample type: primary cells  
 Genomic View: zenbu, UCSC

| Sample information            |                                        | RNA information     |                                                    |
|-------------------------------|----------------------------------------|---------------------|----------------------------------------------------|
| strain                        | NA                                     | lot number          | Mon725                                             |
| tissue                        | blood                                  | catalog number      | 3H100-30-10                                        |
| dev stage                     | 47 years old adult                     | sample type         | total RNA                                          |
| sex                           | male                                   | extraction protocol | OP-RNA-extraction-totalRNA-TRIzol-isopropanol-v1.0 |
| age                           | 47                                     |                     |                                                    |
| cell type                     | monocyte                               |                     |                                                    |
| cell line                     | NA                                     |                     |                                                    |
| company                       | 3HBiomedical                           |                     |                                                    |
| collaboration                 | FANTOM5 OSC CORE (contact: Al Forrest) |                     |                                                    |
| External link for information | 3HBIOMED                               |                     |                                                    |

| Accession numbers         |                     |                   |                  |                  |                   |
|---------------------------|---------------------|-------------------|------------------|------------------|-------------------|
| Method                    | Sample accession id |                   |                  |                  |                   |
| CAGE                      | DRS008019           |                   |                  |                  |                   |
| Library accession numbers |                     |                   |                  |                  |                   |
| Library id                | Method              | Exp. accession id | Run accession id | BAM accession id | CTSS accession id |
| CNhs10852                 | CAGE                | DRX008126         | DRR008998        | DRZ000423        | DRZ001808         |

Relative expression to median (log10)

Transcription factors with enriched expression in this sample

| CAGE peaks | Log10(Relative expression over median) | TPM     | TF      |
|------------|----------------------------------------|---------|---------|
| p1@PLEK    | 2.90                                   | 793.88  | PLEK    |
| p1@SPI1    | 2.61                                   | 405.52  | SP1     |
| p2@NFKB1Z  | 2.29                                   | 267.03  | NFKB1Z  |
| p1@ZEB2    | 2.26                                   | 2250.33 | ZEB2    |
| p1@IRF8    | 2.26                                   | 178.94  | IRF8    |
| p5@ZEB2    | 2.20                                   | 156.23  | ZEB2    |
| p1@ZNF385A | 2.17                                   | 147.36  | ZNF385A |
| p1@THAP2   | 2.07                                   | 154.56  | THAP2   |
| p1@NFKB1A  | 2.06                                   | 6671.21 | NFKB1A  |
| p1@PRDM1   | 2.06                                   | 305.81  | PRDM1   |

Co-expression clusters with enriched expression in this sample

| Coexpression cluster                                                           | score |
|--------------------------------------------------------------------------------|-------|
| C6-CD14-Eosinophils-Basophils-Peripheral-CD34-Natural-immature                 | 1.12  |
| C213-CD14-Natural-CD8-CD4-Basophils-Eosinophils-Peripheral                     | 0.99  |
| C246-Neutrophils-Eosinophils-Whole-CD14-CD14CD16-Basophils-migratory           | 0.97  |
| C293-CD14-CD14CD16-Basophils-Peripheral-immature-Eosinophils-CD34              | 0.85  |
| C151-CD14-Natural-Basophils-CD8-Eosinophils-CD4-Mast                           | 0.82  |
| C265-CD4-Eosinophils-CD14-Natural-CD19-Basophils-CD8                           | 0.82  |
| C294-CD14-Macrophage-Monocytederived-CD14CD16-Neutrophils-Basophils-Peripheral | 0.82  |
| C192-Neutrophils-CD14-Peripheral-Eosinophils-CD8-Natural-CD4                   | 0.81  |
| C26-Eosinophils-Neutrophils-CD14-CD14CD16-Basophils-Monocytederived-Whole      | 0.79  |
| C290-Eosinophils-CD14-Basophils-Mast-CD4-CD8-immature                          | 0.78  |

FANTOM5 phase1 novel unique motifs

| Novel motif | Logo | p-value |
|-------------|------|---------|
| 106         |      | 1.46e-3 |
| 41          |      | 8.08e-3 |
| 99          |      | 8.15e-3 |
| 123         |      | 1.12e-2 |
| 137         |      | 1.64e-2 |

de novo motifs identified by HOMER in promoters active in this sample

| Rank | Motif | P-value | Targetswith Motif | Backgroundswith Motif | Best Match (Score) and Link to Details                |
|------|-------|---------|-------------------|-----------------------|-------------------------------------------------------|
| 1    |       | 1e-520  | 21.89%            | 5.34%                 | HIF1b(hLH)/O785-HIF1b-CHIP-Seq(GSE34871)/Homer (0.99) |
| 2    |       | 1e-424  | 39.44%            | 17.77%                | PR0058_1_Sfp1_1 (0.95)                                |
| 3    |       | 1e-327  | 26.22%            | 10.38%                | CREB1.p2.SwissRegulon.nudfreq (0.88)                  |
| 4    |       | 1e-220  | 42.22%            | 25.39%                | CEBPE_f1_HM09 (0.82)                                  |
| 5    |       | 1e-215  | 21.60%            | 9.48%                 | MA0101.1_REL (0.96)                                   |

Co-expression clusters with enriched expression in this sample

| Coexpression cluster                                                           | score |
|--------------------------------------------------------------------------------|-------|
| C6-CD14-Eosinophils-Basophils-Peripheral-CD34-Natural-immature                 | 1.12  |
| C213-CD14-Natural-CD8-CD4-Basophils-Eosinophils-Peripheral                     | 0.99  |
| C246-Neutrophils-Eosinophils-Whole-CD14-CD14CD16-Basophils-migratory           | 0.97  |
| C293-CD14-CD14CD16-Basophils-Peripheral-immature-Eosinophils-CD34              | 0.85  |
| C151-CD14-Natural-Basophils-CD8-Eosinophils-CD4-Mast                           | 0.82  |
| C265-CD4-Eosinophils-CD14-Natural-CD19-Basophils-CD8                           | 0.82  |
| C294-CD14-Macrophage-Monocytederived-CD14CD16-Neutrophils-Basophils-Peripheral | 0.82  |
| C192-Neutrophils-CD14-Peripheral-Eosinophils-CD8-Natural-CD4                   | 0.81  |
| C26-Eosinophils-Neutrophils-CD14-CD14CD16-Basophils-Monocytederived-Whole      | 0.79  |
| C290-Eosinophils-CD14-Basophils-Mast-CD4-CD8-immature                          | 0.78  |

Repeat families with enriched expression in this sample

| Repeat family | Log10(Relative expression over median) |
|---------------|----------------------------------------|
| RTE_CR1       | 1.64                                   |
| MIR_ERVL-MaLR | 1.14                                   |
| Merlin        | 0.97                                   |
| L1_ERVL-MaLR  | 0.88                                   |
| SINE?         | 0.88                                   |
