# Supplementary material for: Gateways to the FANTOM5 promoter level mammalian expression atlas
Source: PubMed Central journal article supplement (PMC4310165; doi:10.1186/s13059-014-0560-6), 2015-01-05
Supplement: 13059_2014_560_MOESM7_ESM.pdf [file 13059_2014_560_MOESM7_ESM.pdf]

side menu bar

Human

- Samples
- Transcription Factors
- Coexpression module

Mouse

- Samples
- Transcription Factors
- Coexpression module

Cross species

- Cell Type (CL)
- Disease (DOID)
- Anatomy (UBERON)
- Novel motifs
- JASPAR motifs

others

- Data source
- Protocols
- Utilities

Toolbox

- Printable version
- Browse properties

list of samples

Browse samples hg19  
(Redirected from Browse samples)

Details of profiled samples (incl. primary cells, cell lines, and tissues)

Filter by sample category  
 primary cells  tissues  cell lines  fractionations and perturbations  time courses

Show 25 entries

| FF ontology id | Name                                                     | Sample category |
|----------------|----------------------------------------------------------|-----------------|
| 10000-101A1    | Clontech Human Universal Reference Total RNA, pool1      | tissues         |
| 10002-101A5    | SABiosciences XpressRef Human Universal Total RNA, pool1 | tissues         |
| 10007-101B4    | Universal RNA - Human Normal Tissues Biochain, pool1     | tissues         |
| 10010-101C1    | adipose tissue, adult, pool1                             | tissues         |
| 10011-101C2    | bladder, adult, pool1                                    | tissues         |
| 10012-101C3    | brain, adult, pool1                                      | tissues         |
| 10013-101C4    | cervix, adult, pool1                                     | tissues         |
| 10014-101C5    | colon, adult, pool1                                      | tissues         |
| 10015-101C6    | esophagus, adult, pool1                                  | tissues         |
| 10016-101C7    | heart, adult, pool1                                      | tissues         |
| 10017-101C8    | kidney, adult, pool1                                     | tissues         |
| 10018-101C9    | liver, adult, pool1                                      | tissues         |
| 10019-101D1    | lung, adult, pool1                                       | tissues         |
| 10020-101D2    | ovary, adult, pool1                                      | tissues         |
| 10021-101D3    | placenta, adult, pool1                                   | tissues         |
| 10022-101D4    | prostate, adult, pool1                                   | tissues         |
| 10023-101D5    | small intestine, adult, pool1                            | tissues         |
| 10024-101D6    | small intestine, adult, pool1                            | tissues         |
| 10025-101D7    | spleen, adult, pool1                                     | tissues         |
| 10026-101D8    | testis, adult, pool1                                     | tissues         |
| 10027-101D9    | thymus, adult, pool1                                     | tissues         |
| 10028-101E1    | thymus, adult, pool1                                     | tissues         |

list of cell types

Cell Ontology terms list

List of terms in the Cell Type Ontology (CL). Individual entries display the samples associated with the terms.

Show 100 entries

| ID      | Name                                                      |
|---------|-----------------------------------------------------------|
| 0000624 | CD4-positive, alpha-beta T cell                           |
| 0000625 | CD8-positive, alpha-beta T cell                           |
| 0000792 | CD4-positive, CD25-positive, alpha-beta regulatory T cell |
| 0000895 | naive thymus-derived CD4-positive, alpha-beta T cell      |
| 0000897 | CD4-positive, alpha-beta memory T cell                    |
| 0001014 | CD1a-positive Langerhans cell                             |
| 0001016 | immature CD1a-positive Langerhans cell                    |

Uber Anatomy Ontology terms list

Show All entries

| Anatomy page | Name                                | Image from BodyParts3D |
|--------------|-------------------------------------|------------------------|
| 0000916      | abdomen                             |                        |
| 0003497      | abdomen blood vessel                |                        |
| 0005172      | abdomen organ                       |                        |
| 0003835      | abdominal segment blood vessel      |                        |
| 0003838      | abdominal segment connective tissue |                        |
| 0002417      | abdominal segment of trunk          |                        |
| 0005173      | abdominal segment organ             |                        |
| 0000476      | acellular anatomical structure      |                        |
| 0009842      | acinus                              |                        |
| 0001013      | adipose tissue                      |                        |
| 0001235      | adrenal cortex                      |                        |
| 0002369      | adrenal gland                       |                        |
| 0006858      | adrenal/interrenal gland            |                        |
| 0007023      | adult organism                      |                        |
| 0003742      | adventitia                          |                        |
| 0010009      | aggregate regional part of brain    |                        |
| 0002169      | alveolar sac                        |                        |
| 0006524      | alveolar system                     |                        |
| 0004894      | alveolar wall                       |                        |
| 0003215      | alveolus                            |                        |
| 0002299      | alveolus of lung                    |                        |

list of tissues (anatomical systems)

a sample (CD14+ monocyte, donor1)

FF:11224-116B9

Name: CD14+ Monocytes, donor1  
 Species: Human (Homo sapiens)  
 Library ID: CNhs10852  
 Sample type: primary cells  
 Genomic View: zenbu, UCSC

Sample information

|                               |                                        |
|-------------------------------|----------------------------------------|
| strain                        | NA                                     |
| tissue                        | blood                                  |
| dev stage                     | 47 years old adult                     |
| sex                           | male                                   |
| age                           | 47                                     |
| cell type                     | monocyte                               |
| cell line                     | NA                                     |
| company                       | 3HBiomedical                           |
| collaboration                 | FANTOMS OSC CORE (contact: Al Forrest) |
| External link for information | 3HBIOMED                               |

RNA information

|                               |                                                    |
|-------------------------------|----------------------------------------------------|
| lot number                    | Mon725                                             |
| catalog number                | 3H100-30-10                                        |
| sample type                   | total RNA                                          |
| extraction protocol (Details) | OP-RNA-extraction-totalRNA-TRIZol-isopropanol-v1.0 |

Accession numbers

| Library id | Method | Exp. accession id | Run accession id | BAM accession id | CTSS accession id |
|------------|--------|-------------------|------------------|------------------|-------------------|
| CNhs10852  | CAGE   | DRX008126         | DRR008998        | DRZ000423        | DRZ001808         |

ZENBU, UCSC, BioMart, others

Sample ontology term (monocyte)

Ontology Tree: Loaded from BioPortal

Show Network Neighborhood

FF samples

Human (Homo sapiens)

- 10030-101E3 (retina, adult, pool1)
- 10268-104D7 (eye - vitreous humor, donor1)

Enrichment analysis: top 100 FFCP enriched with this ontology term

Copy CSV PDF

| P-value   | FFCP                                          | Short description             |
|-----------|-----------------------------------------------|-------------------------------|
| 1.48e-146 | FFCP_PHASE1:Hg19::chr19:36404746..36404773,+  | p@chr19:36404746..36404773,+  |
| 1.49e-146 | FFCP_PHASE1:Hg19::chr2:143631914..143631925,- | p@chr2:143631914..143631925,- |
| 1.54e-146 | FFCP_PHASE1:Hg19::chrX:129812794..129812795,+ | p@chrX:129812794..129812795,+ |
| 1.84e-146 | FFCP_PHASE1:Hg19::chr6:46698996..46699019,+   | p@chr6:46698996..46699019,+   |
| 2.29e-146 | FFCP_PHASE1:Hg19::chr16:50729592..50729610,-  | p@chr16:50729592..50729610,-  |
| 2.6e-146  | FFCP_PHASE1:Hg19::chr12:10337152..10337171,-  | p@chr12:10337152..10337171,-  |
| 2.99e-146 | FFCP_PHASE1:Hg19::chr19:50284821..50284856,+  | p@chr19:50284821..50284856,+  |
| 3.7e-146  | FFCP_PHASE1:Hg19::chr20:35922890..35922907,+  | p@chr20:35922890..35922907,+  |
| 3.78e-146 | FFCP_PHASE1:Hg19::chr17:76439158..76439173,+  | p@chr17:76439158..76439173,+  |
| 4.04e-146 | FFCP_PHASE1:Hg19::chr21:34774876..34774891,+  | p@IFNGR2                      |
