# Supplementary material for: Gateways to the FANTOM5 promoter level mammalian expression atlas
Source: Springer Nature journal article supplement (doi:10.1186/s13059-014-0560-6), 2015-01-05
Supplement: 13059_2014_560_MOESM8_ESM.pdf [file 13059_2014_560_MOESM8_ESM.pdf]

Enrichment analysis: top 100 FFCP enriched with this ontology term [edit]

Copy CSV TSV PDF

Search:

| P-value  | FFCP                                           | Short description             |
|----------|------------------------------------------------|-------------------------------|
| 6.73e-89 | FFCP_PHASE1:Hg19::chr16:29757272..29757347,-   | p1@C16orf54                   |
| 7.52e-89 | FFCP_PHASE1:Hg19::chr3:107843890..107843896,+  | p@chr3:107843890..107843896,+ |
| 7.87e-89 | FFCP_PHASE1:Hg19::chr7:37382360..37382399,-    | p3@ELMO1                      |
| 1.0e-88  | FFCP_PHASE1:Hg19::chr9:95726554..95726616,+    | p1@FGD3                       |
| 1.09e-88 | FFCP_PHASE1:Hg19::chr12:7060440..7060453,+     | p5@PTPN6                      |
| 1.43e-88 | FFCP_PHASE1:Hg19::chr1:111415757..111415779,+  | p1@CD53                       |
| 1.54e-88 | FFCP_PHASE1:Hg19::chr1:31206388..31206521,-    | p@chr1:312                    |
| 1.61e-88 | FFCP_PHASE1:Hg19::chr11:47400045..47400060,-   | p6@SPI1                       |
| 2.35e-88 | FFCP_PHASE1:Hg19::chr6:159466012..159466030,-  | p1@ACAP1                      |
| 3.46e-88 | FFCP_PHASE1:Hg19::chr17:7239821..7239902,+     | p1@ACAP1                      |
| 5.37e-88 | FFCP_PHASE1:Hg19::chr12:118796915..118796943,- | p2@TAOK3                      |
| 7.55e-88 | FFCP_PHASE1:Hg19::chr2:143886877..143886888,+  | p5@ARHGAP                     |
| 8.15e-88 | FFCP_PHASE1:Hg19::chr2:182322864..182322885,+  | o3@ITGA4                      |

CAGE Expression [edit]

Search:

| Sample                                                                          | p6@SPI1 |
|---------------------------------------------------------------------------------|---------|
| Neutrophils, donor3.CNhs11905.11390-118C4                                       | 92.00   |
| Eosinophils, donor2.CNhs12548.12245-129H4                                       | 72.48   |
| Neutrophils, donor1.CNhs10862.11233-116C9                                       | 71.90   |
| Eosinophils, donor3.CNhs12549.12246-129H5                                       | 69.80   |
| Neutrophils, donor2.CNhs11959.11314-117C9                                       | 65.82   |
| CD14+ monocytes - treated with Salmonella, donor1.CNhs13471.11866-125B3         | 47.59   |
| CD14+ monocytes - treated with Salmonella, donor2.CNhs13485.11876-125C4         | 45.96   |
| Whole blood (ribopure), donor090612, donation1.CNhs11672.12182-129A4            | 42.15   |
| CD14+ monocytes - treated with lipopolysaccharide, donor2.CNhs13533.11875-125C3 | 40.14   |
| CD14+ monocytes - treated with lipopolysaccharide, donor3.CNhs13545.11885-125D4 | 38.92   |
| CD14+ monocytes - treated with Salmonella, donor3.CNhs13493.11886-125D5         | 36.75   |
| Basophils, donor1.CNhs12546.12241-129G9                                         | 36.19   |

Showing 1 to 889 of 889 entries
