# Supplementary material for: Gateways to the FANTOM5 promoter level mammalian expression atlas
Source: PubMed Central journal article supplement (PMC4310165; doi:10.1186/s13059-014-0560-6), 2015-01-05

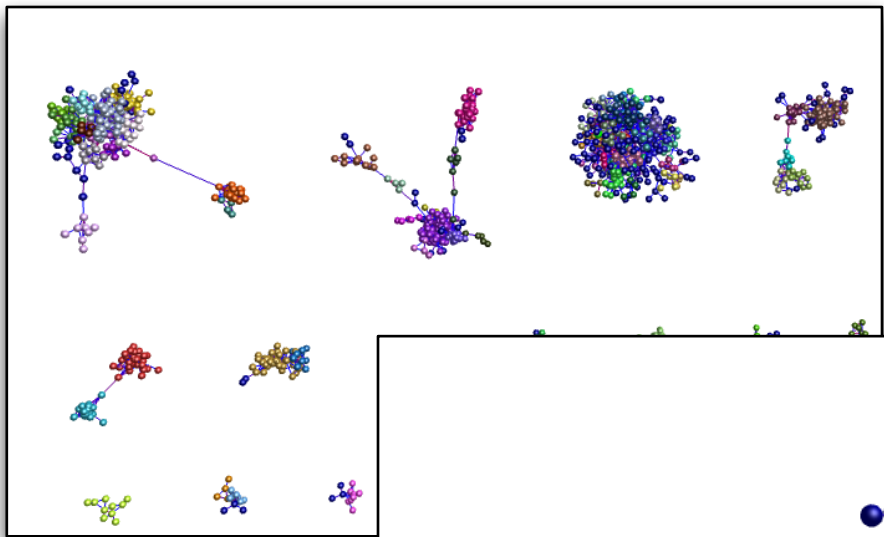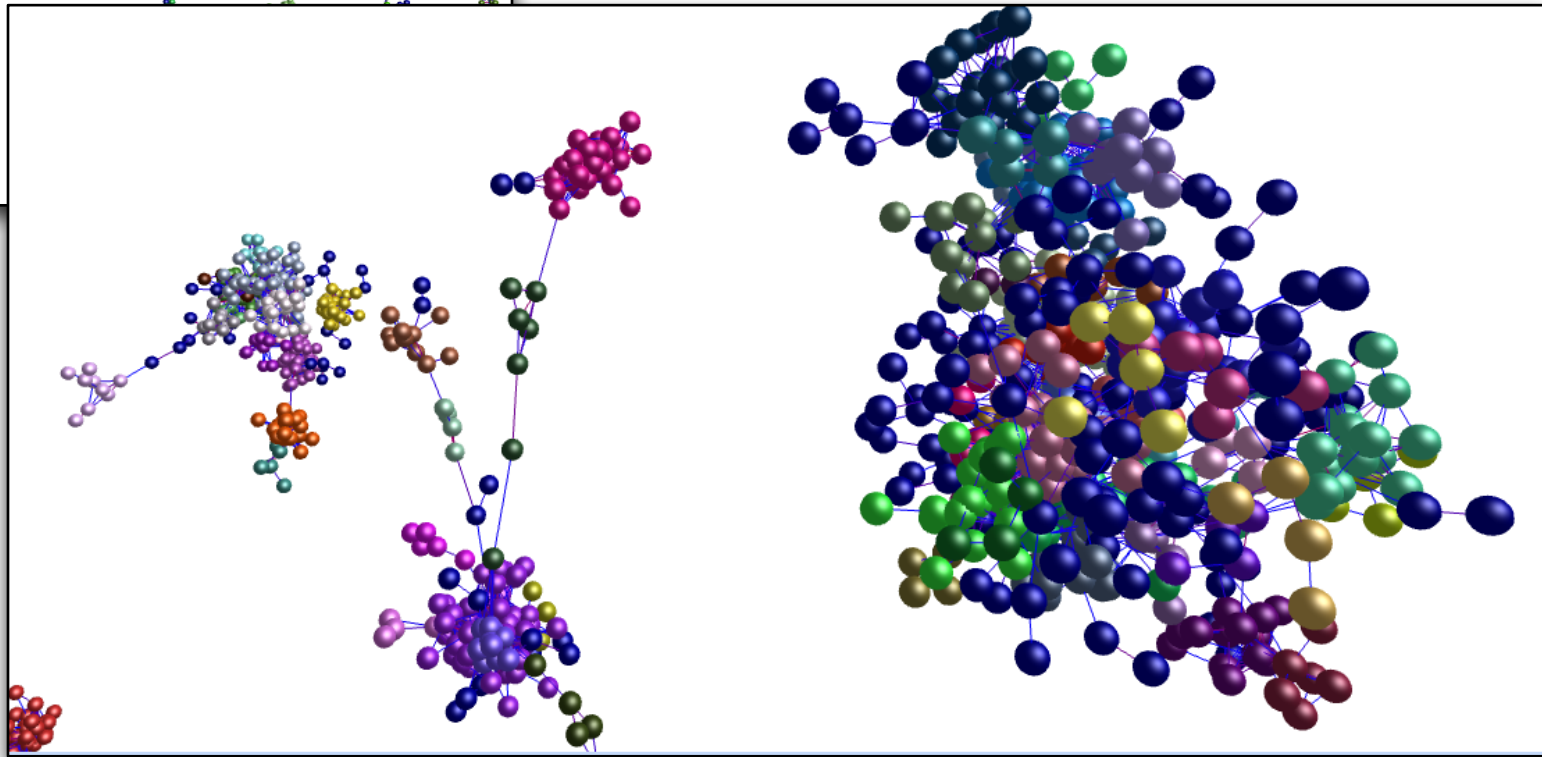

Supplement: 13059_2014_560_MOESM9_ESM.pdf [file 13059_2014_560_MOESM9_ESM.pdf]
