# Supplementary material for: Gateways to the FANTOM5 promoter level mammalian expression atlas
Source: Springer Nature journal article supplement (doi:10.1186/s13059-014-0560-6), 2015-01-05
Supplement: 13059_2014_560_MOESM11_ESM.pdf [file 13059_2014_560_MOESM11_ESM.pdf]

## Main Page

FANTOM5 SSTAR (Semantic catalog of Samples, Transcription initiation And Regulators) provide a way to explore samples, transcriptional initiations, and regulators analyzed in the [FANTOM5 project](#). If you have any questions or comments, please contact to [fantom@gsc.riken.jp](mailto:fantom@gsc.riken.jp)

Search genes

search

Examples

Browse

Samples

Details of profiled samples (incl. primary cells, cell lines, and tissues)

Smooth Muscle Cells - Aortic, donor0

human mouse

Sample

Samples profiled in FANTOM5 are systematically classified by defining FANTOM5

## RB SearchResults

Search within Gene names

Key Word:

search

EntrezGene

■ Tax\_id: 9606=Human, 10090=Mouse

| ◆     | Symbol ◆    | Synonyms ◆                                                                  | Description ◆                                                               | Tax id ◆ |
|-------|-------------|-----------------------------------------------------------------------------|-----------------------------------------------------------------------------|----------|
| 6688  | <b>SPI1</b> | OF<br>PU.1<br>SFP11<br>SPI-1<br>SPI-A                                       | spleen focus forming virus (SFFV) proviral integration oncogene <b>spi1</b> | 9606     |
| 20375 | Sfpi1       | Dis-1<br>Dis1<br>PU.1<br>Sfpi-1<br>Spi-1<br><b>Spi1</b><br>Tcfpu1<br>Tfpu.1 | SFFV proviral integration 1                                                 | 10090    |
| 20700 | Serpina1a   | Aat-2<br>Aat2<br>Dom1<br>PI1<br><b>Spi1</b>                                 | serine (or cysteine) peptidase inhibitor, clade A, member 1A                | 10090    |
