# Supplementary material for: Gateways to the FANTOM5 promoter level mammalian expression atlas
Source: PubMed Central journal article supplement (PMC4310165; doi:10.1186/s13059-014-0560-6), 2015-01-05
Supplement: 13059_2014_560_MOESM12_ESM.pdf [file 13059_2014_560_MOESM12_ESM.pdf]

side menu bar

Human

- Samples
- Transcription Factors**
- Coexpression module

Mouse

- Samples
- Transcription Factors
- Coexpression module

Cross species

- Cell Type (CL)
- Disease (DOID)
- Anatomy (UBERON)
- Novel motifs
- JASPAR motifs

others

- Data source
- Protocols
- Utilities

Toolbox

- Printable version
- Browse properties

list of transcription factors

Browse Transcription Factors hg19

Human transcription factors

Show 25 entries

Search: SPI

| EntrezGene | Symbol | Associated Motif                                                                  | Description                                                                | # |
|------------|--------|-----------------------------------------------------------------------------------|----------------------------------------------------------------------------|---|
| 6688       | SPI1   |  | spleen focus forming virus (SFFV) proviral integration oncogene spi1       | 7 |
| 6689       | SPIB   |  | Spi-B transcription factor (Spi-1)                                         | 1 |
| 2016       | EMX1   | NA                                                                                | emx1, engrailed, homeobox 1                                                | 6 |
| 2018       | EMX2   | NA                                                                                | emx2, engrailed, homeobox 2                                                | 6 |
| 4899       | NRF1   | NA                                                                                | nrf1, nuclear respiratory factor 1                                         | 6 |
| 121599     | SPIC   | NA                                                                                | spic, spleen focus forming virus (SFFV) proviral integration oncogene spi1 | 6 |

Showing 1 to 6 of 6 entries (filtered)

Gene page (SPI1)

EntrezGene: 6688

Symbol: SPI1

Description: spleen focus forming virus (SFFV) proviral integration oncogene spi1

Synonyms: OF, PU.1, SFP11, SPI-1, SPI-A

Species: Human (Homo sapiens)

Xrefs: EntrezGene:6688 [Collapse]

- Ensembl:ENSG00000066336
- HGNC:11241
- HPRD:01305
- MIM:165170
- Vega:OTTHUMG00000150150

Associated motifs:

 MA0080.2

Transcription Factor?: Yes

TSS regions:

- Hg19::chr11:47400078..47400106,- (p1@SPI1)
- Hg19::chr11:47400062..47400077,- (p2@SPI1)
- Hg19::chr11:47399947..47399961,- (p3@SPI1)
- Hg19::chr11:47399996..47400014,- (p4@SPI1)
- Hg19::chr11:47400032..47400043,- (p5@SPI1)
- Hg19::chr11:47400045..47400060,- (p6@SPI1)
- Hg19::chr11:47399920..47399931,- (p7@SPI1)

View on UCSC genome browser

Mouse over to see Genome browser image, Click image to go to Genome browser



Motif page (SPI1)

JASPAR motif: MA0080.2

JASPAR ID: MA0080.2

name: Human (Homo sapiens)

name: SPI1 spleen focus forming virus (SFFV) proviral integration oncogene spi1

xref: Jaspas Database



Association to promoter expression in human samples

Show 10 entries

FF samples

- CD14+ monocyte derived endothelial progenitor cells, donor3.CNhs11904.
- Whole blood (ribopure), donor090309, donation3.CNhs11948.12181-129A
- CD14+ monocyte derived endothelial progenitor cells, donor2.CNhs11897.
- Macrophage - monocyte derived, donor1.CNhs10861.11232-116C8
- Whole blood (ribopure), donor090325, donation1.CNhs11075.12176-12817
- Whole blood (ribopure), donor090325, donation2.CNhs11076.12177-12818
- Whole blood (ribopure), donor090612, donation1.CNhs11672.12182-129A

Browse JASPAR motifs

Show 25 entries

Search: MA008

| JASPAR ID | Logo                                                                                 | name   |
|-----------|--------------------------------------------------------------------------------------|--------|
| MA0080.2  |  | SPI1   |
| MA0081.1  |  | SPIB   |
| MA0083.1  |  | SRF    |
| MA0084.1  |  | SRY    |
| MA0087.1  |  | Sox5   |
| MA0088.1  |  | zfn143 |

Showing 1 to 6 of 6 entries (filtered from 112 total entries)

list of DNA binding motifs

Search:

|        | p-value  |
|--------|----------|
| 12162- | 4.72e-16 |
| 12164- | 7.91e-16 |
| 12164- | 1.12e-15 |
