# Supplementary material for: Gateways to the FANTOM5 promoter level mammalian expression atlas
Source: PubMed Central journal article supplement (PMC4310165; doi:10.1186/s13059-014-0560-6), 2015-01-05
Supplement: 13059_2014_560_MOESM13_ESM.pdf [file 13059_2014_560_MOESM13_ESM.pdf]

ZENBU | [gLyphs genome browser](#) | **data explorer** | [user collaboration](#) | [documentation wiki](#)

**Views** | [Tracks](#) | [Expression experiments](#) | [Annotation data](#) | [Scripts](#)

Search:    collaborative project:

genome:

10 filtered 10 total configs [<< previous page](#) | Page: 1 | [next page >>](#) page size:

| row | view                 | genome | name                                                       | description                                    | create date                        | accessed |
|-----|----------------------|--------|------------------------------------------------------------|------------------------------------------------|------------------------------------|----------|
| 1   | <a href="#">view</a> | hg19   | <a href="#">FANTOM5 human promoterome view Nov-28-2012</a> | Configuration for FANTOM5 promoterome samples. | Marina<br>Wed Nov 28 15:30:02 2012 | 85       |

ZENBU | [gLyphs genome browser](#) | **data explorer** | [user collaboration](#) | [documentation wiki](#)

**Views** | [Tracks](#) | **Expression experiments** | [Annotation data](#) | [Scripts](#)

Search:    collaborative project:

genome:  experiment platforms:

2768 filtered 7744 total experiments [select all](#) [<< previous page](#) | Page: 1 2 3 4 5 6 7 8 9 ... 139 | [next page >>](#) page size:

| row | select                   | platform    | experiment name                                                                                                                      | genome | cellline / tissue                    | time point | treatment | description                                |
|-----|--------------------------|-------------|--------------------------------------------------------------------------------------------------------------------------------------|--------|--------------------------------------|------------|-----------|--------------------------------------------|
| 1   | <input type="checkbox"/> | helicosCAGE | <a href="#">Monocyte-derived macrophages response to udm influenza infection, 00hr00min, donor4 (227 121:Ud 0h) : CNhs13639 ctss</a> | hg19   | HMDM blood                           | 0.000      | Ud 0h     | FANTOM5 HeliscopeCAGE                      |
| 2   | <input type="checkbox"/> | helicosCAGE | <a href="#">acute myeloid leukemia (FAB M4eo) cell line:EoL-3 : CNhs13057 ctss</a>                                                   | hg19   | eosinophil progenitor cell blood     | 0.000      |           | FANTOM5 HeliscopeCAGE                      |
| 3   | <input type="checkbox"/> | helicosCAGE | <a href="#">promyelocytes/myelocytes PMC, donor3 : CNhs12529 ctss</a>                                                                | hg19   | promyelocytes/myelocytes bone marrow | 0.000      |           | FANTOM5 HeliscopeCAGE                      |
| 4   | <input type="checkbox"/> | helicosCAGE | <a href="#">adrenal gland, neonate N25 : CNhs11223 ctss</a>                                                                          | mm9    | adrenal gland                        | 0.000      |           | FANTOM5 HeliscopeCAGE                      |
| 5   | <input type="checkbox"/> | helicosCAGE | <a href="#">Small Airway Epithelial Cells, donor1 : CNhs10884 bam</a>                                                                | hg19   | pneumocyte lung                      | 0.000      |           | FANTOM5 HeliscopeCAGE (batch(seq.offset)2) |
