# Supplementary material for: Gateways to the FANTOM5 promoter level mammalian expression atlas
Source: Springer Nature journal article supplement (doi:10.1186/s13059-014-0560-6), 2015-01-05
Supplement: 13059_2014_560_MOESM14_ESM.pdf [file 13059_2014_560_MOESM14_ESM.pdf]

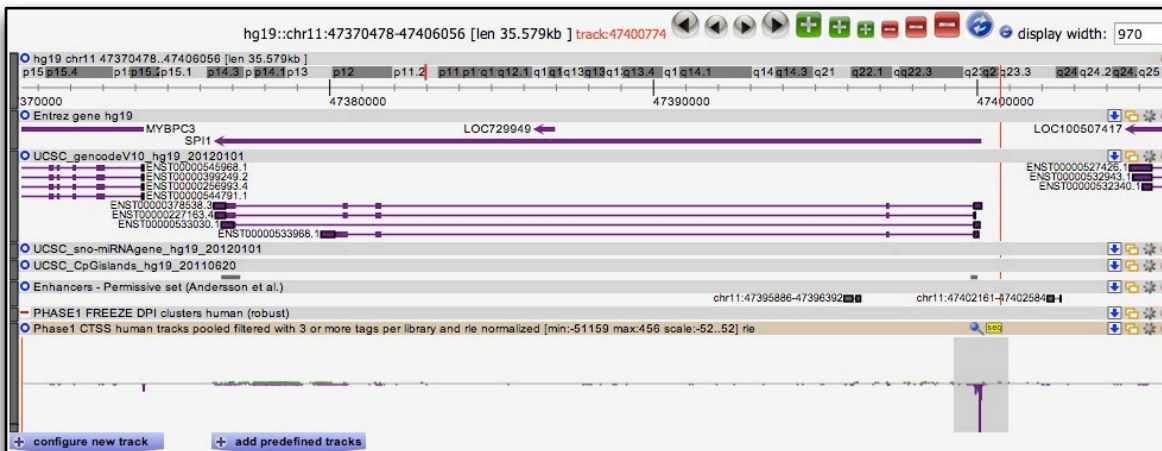

**Phase1 CTSS human tracks pooled filtered with 3 or more tags per library and rle normalized (47399270..47400921) 1.652k**

| experiment name                                                                 | <- reverse strand | > forward strand -> |
|---------------------------------------------------------------------------------|-------------------|---------------------|
| ocacanthotic squamous carcinoma cell line:HCC1806 : CNhs11844 ctss [rle]        | 0                 | 0                   |
| achilles tendon, donor2 : CNhs13435 ctss [rle]                                  | 254.79            | 0                   |
| ocacute lymphoblastic leukemia (B-ALL) cell line:BALL-1 : CNhs11251 ctss [rle]  | 69.68             | 0                   |
| ocacute lymphoblastic leukemia (B-ALL) cell line:NALM-6 : CNhs11282 ctss [rle]  | 56.26             | 0.14                |
| ocacute lymphoblastic leukemia (T-ALL) cell line:HPB-ALL : CNhs10746 ctss [rle] | 0                 | 0                   |
| ocacute lymphoblastic leukemia (T-ALL) cell line:Jurkat : CNhs11253 ctss [rle]  | 0                 | 0                   |
| ocacute myeloid leukemia (FAB M0) cell line:Kasumi-3 : CNhs13241 ctss [rle]     | 236.7             | 0.19                |
| ocacute myeloid leukemia (FAB M0) cell line:KG-1 : CNhs13053 ctss [rle]         | 166.08            | 0                   |
| ocacute myeloid leukemia (FAB M1) cell line:HYT-1 : CNhs13054 ctss [rle]        | 156.43            | 0                   |
| ocacute myeloid leukemia (FAB M2) cell line:Kasumi-1 : CNhs13502 ctss [rle]     | 159.78            | 0                   |
| ocacute myeloid leukemia (FAB M2) cell line:Kasumi-6 : CNhs13052 ctss [rle]     | 160.05            | 0                   |
| ocacute myeloid leukemia (FAB M2) cell line:NKM-1 : CNhs11864 ctss [rle]        | 124.39            | 0.23                |
| ocacute myeloid leukemia (FAB M3) cell line:HL60 : CNhs13055 ctss [rle]         | 272.31            | 0                   |
| ocacute myeloid leukemia (FAB M4) cell line:FKH-1 : CNhs13503 ctss [rle]        | 130.33            | 0                   |
| ocacute myeloid leukemia (FAB M4) cell line:HNT-34 : CNhs13504 ctss [rle]       | 141.19            | 0.17                |

**Phase1 CTSS human tracks pooled filtered with 3 or more tags per library and rle normalized (47399270..47400921) 1.652k**

| experiment name                                                                          | <- reverse strand | > forward strand -> |
|------------------------------------------------------------------------------------------|-------------------|---------------------|
| CD14+ monocytes - treated with Salmonella, donor1 : CNhs13471 ctss [rle]                 | 1916.83           | 3.19                |
| CD14+ monocytes - treated with Salmonella, donor3 : CNhs13493 ctss [rle]                 | 1742.66           | 4.36                |
| CD14+ monocytes - treated with Salmonella, donor2 : CNhs13485 ctss [rle]                 | 1569.39           | 1.13                |
| CD14+ monocytes - treated with B-glucan, donor1 : CNhs13474 ctss [rle]                   | 1380.4            | 1.63                |
| CD14+ monocytes - treated with lipopolysaccharide, donor1 : CNhs13470 ctss [rle]         | 1377.89           | 1.21                |
| CD14+ monocytes - treated with Group A streptococci, donor1 : CNhs13469 ctss [rle]       | 1339.12           | 0.92                |
| CD14+ monocytes - treated with lipopolysaccharide, donor2 : CNhs13533 ctss [rle]         | 1272.4            | 1.47                |
| CD14+ monocytes - treated with lipopolysaccharide, donor3 : CNhs13545 ctss [rle]         | 1218.7            | 4.75                |
| CD14+ monocytes - treated with Cryptococcus, donor1 : CNhs13472 ctss [rle]               | 1199.67           | 0.75                |
| CD14+ monocytes - treated with BCG, donor2 : CNhs13475 ctss [rle]                        | 1144.27           | 2.56                |
| CD14+ monocytes - treated with B-glucan, donor2 : CNhs13489 ctss [rle]                   | 1144.28           | 0.41                |
| CD14+ monocytes - treated with BCG, donor1 : CNhs13465 ctss [rle]                        | 1115.67           | 4.32                |
| CD14+ monocytes - treated with B-glucan, donor3 : CNhs13495 ctss [rle]                   | 1117.42           | 2.17                |
| CD14+ monocytes - treated with Group A streptococci, donor3 : CNhs13492 ctss [rle]       | 1111.81           | 2.56                |
| CD14+ monocytes - treated with Candida, donor1 : CNhs13473 ctss [rle]                    | 1101.12           | 1.38                |
| CD14+ monocytes - treated with Group A streptococci, donor2 : CNhs13532 ctss [rle]       | 1071.26           | 0.64                |
| CD14+ monocytes - mock treated, donor3 : CNhs13491 ctss [rle]                            | 1056.21           | 0                   |
| CD14+ monocytes - treated with IFN + N-hexane, donor2 : CNhs13476 ctss [rle]             | 1044.79           | 0.6                 |
| CD14+ monocytes - treated with Cryptococcus, donor2 : CNhs13487 ctss [rle]               | 1024.76           | 1.64                |
| CD14+ monocytes - mock treated, donor1 : CNhs13468 ctss [rle]                            | 1025.78           | 0.44                |
| CD14+ monocytes - treated with Candida, donor2 : CNhs13488 ctss [rle]                    | 1017.93           | 0.65                |
| CD14+ monocytes - treated with Candida, donor3 : CNhs13494 ctss [rle]                    | 1014.34           | 2.71                |
| CD14+ monocytes - mock treated, donor2 : CNhs13484 ctss [rle]                            | 1014.22           | 0.38                |
| CD14+ monocytes - treated with Trehalose dimycolate (TDM), donor1 : CNhs13467 ctss [rle] | 1003.99           | 1.76                |
| CD14+ monocytes - treated with IFN + N-hexane, donor1 : CNhs13466 ctss [rle]             | 990.87            | 0                   |
| CD14-CD16+ Monocytes, donor1 : CNhs13229 ctss [rle]                                      | 985.71            | 0.86                |
| CD14+ Monocytes, donor2 : CNhs11954 ctss [rle]                                           | 984.47            | 1.4                 |
| CD14+ monocytes - treated with IFN + N-hexane, donor3 : CNhs13490 ctss [rle]             | 984.58            | 1.28                |

**experiment sort order**

name     expression (+ strand)  
 series/time point     expression (- strand)  
 series set     expression (both strands)

hide deactivated experiments

reconfigure with active experiments

Experiment filter:
