# Supplementary material for: Gateways to the FANTOM5 promoter level mammalian expression atlas
Source: Springer Nature journal article supplement (doi:10.1186/s13059-014-0560-6), 2015-01-05
Supplement: 13059_2014_560_MOESM16_ESM.pdf [file 13059_2014_560_MOESM16_ESM.pdf]

[New](#)
[Count](#)
[Results](#)
[★ URL](#)
[XML](#)
[Perl](#)
[Help](#)

**Dataset 8 / 1048124 Entries**

hg19 CAGE Peaks (with 12-01-26 annotation)

### Filters

Short description (e.g. p1@TP53): %SPI1%

### Attributes

CAGE peak ID  
Short description  
HGNC ID  
TATA  
CpG

Export all results to  results only    Unique

Email notification to

View  rows as   Unique results only

| CAGE peak ID                               | Short description | HGNC ID | TATA | CpG |
|--------------------------------------------|-------------------|---------|------|-----|
| <a href="#">chr11:47399920..47399931.-</a> | p7@SPI1           | 11241   | 0    | 1   |
| <a href="#">chr11:47399947..47399961.-</a> | p3@SPI1           | 11241   | 0    | 1   |
| <a href="#">chr11:47399996..47400014.-</a> | p4@SPI1           | 11241   | 0    | 1   |
| <a href="#">chr11:47400032..47400043.-</a> | p5@SPI1           | 11241   | 0    | 0   |
| <a href="#">chr11:47400045..47400060.-</a> | p6@SPI1           | 11241   | 0    | 0   |
| <a href="#">chr11:47400062..47400077.-</a> | p2@SPI1           | 11241   | 0    | 0   |
| <a href="#">chr11:47400078..47400106.-</a> | p1@SPI1           | 11241   | 0    | 0   |
| <a href="#">chr11:47400277..47400279.-</a> | p8@SPI1           | 11241   | 0    | 0   |
