# Supplementary material for: Gateways to the FANTOM5 promoter level mammalian expression atlas
Source: Springer Nature journal article supplement (doi:10.1186/s13059-014-0560-6), 2015-01-05
Supplement: 13059_2014_560_MOESM17_ESM.pdf [file 13059_2014_560_MOESM17_ESM.pdf]

# FANTOM5 Table Extraction Tool

Instructions

Show Me

Dataset Expression (RLE normalized) of robust phase 1 CA...

Column(s) 00Annotation

- tpm.Adipocyte - breast, donor1.CNhs11051.11376-118A8 ×
- tpm.Adipocyte - breast, donor2.CNhs11969.11327-117E4 ×
- tpm.Adipocyte - omental, donor3.CNhs12068.11475-119C8 ×
- tpm.CD14+ Monocytes, donor1.CNhs10852.11224-116B9 ×
- tpm.CD14+ Monocytes, donor2.CNhs11954.11305-117B9 ×

Search text tpm.Adipocyte - omental, donor1.CNhs11054.11473-119C6

- tpm.Adipocyte - omental, donor2.CNhs12067.11474-119C7
- tpm.Adipocyte - perirenal, donor1.CNhs12069.11476-119C9

TET Sources Help Contact

tpm.CD14+ Monocytes, donor1.CNhs10852.11224-116B9

## Expression (RLE normalized) of robust phase 1 CAGE peaks for human samples

| 00Annotation                 | tpm.Adipocyte%20-%20breast%2c%20donor1.CNhs11051.11376-118A8 | tpm.Adipocyte%20-%20breast%2c%20donor2.CNhs11969.11327-117E4 | tpm.Adipocyte%20-%20omental%2c%20donor3.CNhs12068.11475-119C8 |
|------------------------------|--------------------------------------------------------------|--------------------------------------------------------------|---------------------------------------------------------------|
| chr11:10019853..10019866,-   | 0.363356758541113                                            | 0                                                            | 0                                                             |
| chr11:10050027..10050030,-   | 0                                                            | 0.856402095563933                                            | 0                                                             |
| chr11:100557931..100557947,+ | 0                                                            | 0                                                            | 0.446961094427288                                             |
| chr11:100557958..100558008,+ | 0                                                            | 1.2846031433459                                              | 0.446961094427288                                             |
| chr11:100558010..100558029,+ | 0.363356758541113                                            | 0.642301571672949                                            | 0.446961094427288                                             |
| chr11:100558047..100558067,+ | 0.363356758541113                                            | 0.214100523890983                                            | 0.446961094427288                                             |
| chr11:100586137..100586142,+ | 0                                                            | 0                                                            | 0                                                             |
| chr11:10066129..10066131,-   | 0                                                            | 0                                                            | 0                                                             |
| chr11:10066159..10066186,-   | 0                                                            | 0                                                            | 0                                                             |
| chr11:1006616..1006623,+     | 0                                                            | 0                                                            | 0                                                             |
