# Supplementary material for: Gateways to the FANTOM5 promoter level mammalian expression atlas
Source: Springer Nature journal article supplement (doi:10.1186/s13059-014-0560-6), 2015-01-05
Supplement: 13059_2014_560_MOESM18_ESM.pdf [file 13059_2014_560_MOESM18_ESM.pdf]

## Nanopublication

Assertion: minimal scientific statement

Provenance: how the assertion came to be

Publication Info: how the nanopublication came to be
