# Supplementary material for: Gateways to the FANTOM5 promoter level mammalian expression atlas
Source: PubMed Central journal article supplement (PMC4310165; doi:10.1186/s13059-014-0560-6), 2015-01-05
Supplement: 13059_2014_560_MOESM20_ESM.pdf [file 13059_2014_560_MOESM20_ESM.pdf]

| cageStart | cageEnd  | cageChromosome                                                                                                                          | cellTypeLabel                                                               | tpmValue |
|-----------|----------|-----------------------------------------------------------------------------------------------------------------------------------------|-----------------------------------------------------------------------------|----------|
| 17741254  | 17741282 | <a href="http://rdf.biosemantics.org/data/genomeassemblies/hg19#chr11">http://rdf.biosemantics.org/data/genomeassemblies/hg19#chr11</a> | skeletal muscle, fetal, donor1                                              | 22.0365  |
| 17741254  | 17741282 | <a href="http://rdf.biosemantics.org/data/genomeassemblies/hg19#chr11">http://rdf.biosemantics.org/data/genomeassemblies/hg19#chr11</a> | Skeletal Muscle Satellite Cells, donor3                                     | 3.40907  |
| 17741254  | 17741282 | <a href="http://rdf.biosemantics.org/data/genomeassemblies/hg19#chr11">http://rdf.biosemantics.org/data/genomeassemblies/hg19#chr11</a> | Skeletal Muscle Cells, donor4                                               | 0.462146 |
| 17741254  | 17741282 | <a href="http://rdf.biosemantics.org/data/genomeassemblies/hg19#chr11">http://rdf.biosemantics.org/data/genomeassemblies/hg19#chr11</a> | Skeletal Muscle Cells, donor5                                               | 2.14905  |
| 17741254  | 17741282 | <a href="http://rdf.biosemantics.org/data/genomeassemblies/hg19#chr11">http://rdf.biosemantics.org/data/genomeassemblies/hg19#chr11</a> | Skeletal Muscle Cells, donor6                                               | 4.1351   |
| 17741254  | 17741282 | <a href="http://rdf.biosemantics.org/data/genomeassemblies/hg19#chr11">http://rdf.biosemantics.org/data/genomeassemblies/hg19#chr11</a> | Skeletal Muscle Cells, donor1                                               | 34.8981  |
| 17741254  | 17741282 | <a href="http://rdf.biosemantics.org/data/genomeassemblies/hg19#chr11">http://rdf.biosemantics.org/data/genomeassemblies/hg19#chr11</a> | Skeletal muscle cells differentiated into Myotubes – multinucleated, donor1 | 11.8413  |
| 17741254  | 17741282 | <a href="http://rdf.biosemantics.org/data/genomeassemblies/hg19#chr11">http://rdf.biosemantics.org/data/genomeassemblies/hg19#chr11</a> | Skeletal Muscle Satellite Cells, donor1                                     | 0.322261 |
| 17741254  | 17741282 | <a href="http://rdf.biosemantics.org/data/genomeassemblies/hg19#chr11">http://rdf.biosemantics.org/data/genomeassemblies/hg19#chr11</a> | skeletal muscle, adult, pool1                                               | 1.43728  |
| 17741254  | 17741282 | <a href="http://rdf.biosemantics.org/data/genomeassemblies/hg19#chr11">http://rdf.biosemantics.org/data/genomeassemblies/hg19#chr11</a> | Skeletal Muscle Satellite Cells, donor2                                     | 0.725083 |
| 17741254  | 17741282 | <a href="http://rdf.biosemantics.org/data/genomeassemblies/hg19#chr11">http://rdf.biosemantics.org/data/genomeassemblies/hg19#chr11</a> | skeletal muscle – soleus muscle, donor1                                     | 1.29486  |
| 17741228  | 17741243 | <a href="http://rdf.biosemantics.org/data/genomeassemblies/hg19#chr11">http://rdf.biosemantics.org/data/genomeassemblies/hg19#chr11</a> | skeletal muscle, fetal, donor1                                              | 3.47944  |
| 17741228  | 17741243 | <a href="http://rdf.biosemantics.org/data/genomeassemblies/hg19#chr11">http://rdf.biosemantics.org/data/genomeassemblies/hg19#chr11</a> | Skeletal Muscle Satellite Cells, donor3                                     | 0.681813 |
| 17741228  | 17741243 | <a href="http://rdf.biosemantics.org/data/genomeassemblies/hg19#chr11">http://rdf.biosemantics.org/data/genomeassemblies/hg19#chr11</a> | Skeletal Muscle Cells, donor4                                               | 0.308097 |
| 17741228  | 17741243 | <a href="http://rdf.biosemantics.org/data/genomeassemblies/hg19#chr11">http://rdf.biosemantics.org/data/genomeassemblies/hg19#chr11</a> | Skeletal Muscle Cells, donor5                                               | 0.460511 |
| 17741228  | 17741243 | <a href="http://rdf.biosemantics.org/data/genomeassemblies/hg19#chr11">http://rdf.biosemantics.org/data/genomeassemblies/hg19#chr11</a> | Skeletal Muscle Cells, donor6                                               | 0.689183 |
| 17741228  | 17741243 | <a href="http://rdf.biosemantics.org/data/genomeassemblies/hg19#chr11">http://rdf.biosemantics.org/data/genomeassemblies/hg19#chr11</a> | Skeletal Muscle Cells, donor1                                               | 2.90012  |
| 17741228  | 17741243 | <a href="http://rdf.biosemantics.org/data/genomeassemblies/hg19#chr11">http://rdf.biosemantics.org/data/genomeassemblies/hg19#chr11</a> | Skeletal muscle cells differentiated into Myotubes – multinucleated, donor1 | 0.89032  |
| 17741228  | 17741243 | <a href="http://rdf.biosemantics.org/data/genomeassemblies/hg19#chr11">http://rdf.biosemantics.org/data/genomeassemblies/hg19#chr11</a> | Skeletal Muscle Satellite Cells, donor1                                     | 0        |
| 17741228  | 17741243 | <a href="http://rdf.biosemantics.org/data/genomeassemblies/hg19#chr11">http://rdf.biosemantics.org/data/genomeassemblies/hg19#chr11</a> | skeletal muscle, adult, pool1                                               | 0.102663 |
| 17741228  | 17741243 | <a href="http://rdf.biosemantics.org/data/genomeassemblies/hg19#chr11">http://rdf.biosemantics.org/data/genomeassemblies/hg19#chr11</a> | Skeletal Muscle Satellite Cells, donor2                                     | 0.145017 |
| 17741228  | 17741243 | <a href="http://rdf.biosemantics.org/data/genomeassemblies/hg19#chr11">http://rdf.biosemantics.org/data/genomeassemblies/hg19#chr11</a> | skeletal muscle – soleus muscle, donor1                                     | 0.647429 |
| 17741206  | 17741215 | <a href="http://rdf.biosemantics.org/data/genomeassemblies/hg19#chr11">http://rdf.biosemantics.org/data/genomeassemblies/hg19#chr11</a> | skeletal muscle, fetal, donor1                                              | 6.95889  |
| 17741206  | 17741215 | <a href="http://rdf.biosemantics.org/data/genomeassemblies/hg19#chr11">http://rdf.biosemantics.org/data/genomeassemblies/hg19#chr11</a> | Skeletal Muscle Satellite Cells, donor3                                     | 0.25568  |
| 17741206  | 17741215 | <a href="http://rdf.biosemantics.org/data/genomeassemblies/hg19#chr11">http://rdf.biosemantics.org/data/genomeassemblies/hg19#chr11</a> | Skeletal Muscle Cells, donor4                                               | 0.308097 |
| 17741206  | 17741215 | <a href="http://rdf.biosemantics.org/data/genomeassemblies/hg19#chr11">http://rdf.biosemantics.org/data/genomeassemblies/hg19#chr11</a> | Skeletal Muscle Cells, donor5                                               | 0.460511 |
| 17741206  | 17741215 | <a href="http://rdf.biosemantics.org/data/genomeassemblies/hg19#chr11">http://rdf.biosemantics.org/data/genomeassemblies/hg19#chr11</a> | Skeletal Muscle Cells, donor6                                               | 0.137837 |
| 17741206  | 17741215 | <a href="http://rdf.biosemantics.org/data/genomeassemblies/hg19#chr11">http://rdf.biosemantics.org/data/genomeassemblies/hg19#chr11</a> | Skeletal Muscle Cells, donor1                                               | 2.70678  |
| 17741206  | 17741215 | <a href="http://rdf.biosemantics.org/data/genomeassemblies/hg19#chr11">http://rdf.biosemantics.org/data/genomeassemblies/hg19#chr11</a> | Skeletal muscle cells differentiated into Myotubes – multinucleated, donor1 | 0.801288 |
| 17741206  | 17741215 | <a href="http://rdf.biosemantics.org/data/genomeassemblies/hg19#chr11">http://rdf.biosemantics.org/data/genomeassemblies/hg19#chr11</a> | Skeletal Muscle Satellite Cells, donor1                                     | 0        |
| 17741206  | 17741215 | <a href="http://rdf.biosemantics.org/data/genomeassemblies/hg19#chr11">http://rdf.biosemantics.org/data/genomeassemblies/hg19#chr11</a> | skeletal muscle, adult, pool1                                               | 0.102663 |
| 17741206  | 17741215 | <a href="http://rdf.biosemantics.org/data/genomeassemblies/hg19#chr11">http://rdf.biosemantics.org/data/genomeassemblies/hg19#chr11</a> | Skeletal Muscle Satellite Cells, donor2                                     | 0        |
| 17741206  | 17741215 | <a href="http://rdf.biosemantics.org/data/genomeassemblies/hg19#chr11">http://rdf.biosemantics.org/data/genomeassemblies/hg19#chr11</a> | skeletal muscle – soleus muscle, donor1                                     | 0.647429 |
| 17741111  | 17741124 | <a href="http://rdf.biosemantics.org/data/genomeassemblies/hg19#chr11">http://rdf.biosemantics.org/data/genomeassemblies/hg19#chr11</a> | skeletal muscle, fetal, donor1                                              | 8.1187   |
| 17741111  | 17741124 | <a href="http://rdf.biosemantics.org/data/genomeassemblies/hg19#chr11">http://rdf.biosemantics.org/data/genomeassemblies/hg19#chr11</a> | Skeletal Muscle Satellite Cells, donor3                                     | 16.7896  |
| 17741111  | 17741124 | <a href="http://rdf.biosemantics.org/data/genomeassemblies/hg19#chr11">http://rdf.biosemantics.org/data/genomeassemblies/hg19#chr11</a> | Skeletal Muscle Cells, donor4                                               | 8.47267  |
| 17741111  | 17741124 | <a href="http://rdf.biosemantics.org/data/genomeassemblies/hg19#chr11">http://rdf.biosemantics.org/data/genomeassemblies/hg19#chr11</a> | Skeletal Muscle Cells, donor5                                               | 12.4338  |
| 17741111  | 17741124 | <a href="http://rdf.biosemantics.org/data/genomeassemblies/hg19#chr11">http://rdf.biosemantics.org/data/genomeassemblies/hg19#chr11</a> | Skeletal Muscle Cells, donor6                                               | 11.1648  |
| 17741111  | 17741124 | <a href="http://rdf.biosemantics.org/data/genomeassemblies/hg19#chr11">http://rdf.biosemantics.org/data/genomeassemblies/hg19#chr11</a> | Skeletal Muscle Cells, donor1                                               | 162.793  |
| 17741111  | 17741124 | <a href="http://rdf.biosemantics.org/data/genomeassemblies/hg19#chr11">http://rdf.biosemantics.org/data/genomeassemblies/hg19#chr11</a> | Skeletal muscle cells differentiated into Myotubes – multinucleated, donor1 | 36.5031  |
| 17741111  | 17741124 | <a href="http://rdf.biosemantics.org/data/genomeassemblies/hg19#chr11">http://rdf.biosemantics.org/data/genomeassemblies/hg19#chr11</a> | Skeletal Muscle Satellite Cells, donor1                                     | 0.966782 |
| 17741111  | 17741124 | <a href="http://rdf.biosemantics.org/data/genomeassemblies/hg19#chr11">http://rdf.biosemantics.org/data/genomeassemblies/hg19#chr11</a> | skeletal muscle, adult, pool1                                               | 15.9127  |
| 17741111  | 17741124 | <a href="http://rdf.biosemantics.org/data/genomeassemblies/hg19#chr11">http://rdf.biosemantics.org/data/genomeassemblies/hg19#chr11</a> | Skeletal Muscle Satellite Cells, donor2                                     | 3.4804   |
| 17741111  | 17741124 | <a href="http://rdf.biosemantics.org/data/genomeassemblies/hg19#chr11">http://rdf.biosemantics.org/data/genomeassemblies/hg19#chr11</a> | skeletal muscle – soleus muscle, donor1                                     | 1.29486  |
| 17741084  | 17741094 | <a href="http://rdf.biosemantics.org/data/genomeassemblies/hg19#chr11">http://rdf.biosemantics.org/data/genomeassemblies/hg19#chr11</a> | skeletal muscle, fetal, donor1                                              | 2.31963  |
| 17741084  | 17741094 | <a href="http://rdf.biosemantics.org/data/genomeassemblies/hg19#chr11">http://rdf.biosemantics.org/data/genomeassemblies/hg19#chr11</a> | Skeletal Muscle Satellite Cells, donor3                                     | 2.38635  |
| 17741084  | 17741094 | <a href="http://rdf.biosemantics.org/data/genomeassemblies/hg19#chr11">http://rdf.biosemantics.org/data/genomeassemblies/hg19#chr11</a> | Skeletal Muscle Cells, donor4                                               | 0.462146 |
| 17741084  | 17741094 | <a href="http://rdf.biosemantics.org/data/genomeassemblies/hg19#chr11">http://rdf.biosemantics.org/data/genomeassemblies/hg19#chr11</a> | Skeletal Muscle Cells, donor5                                               | 1.53504  |
| 17741084  | 17741094 | <a href="http://rdf.biosemantics.org/data/genomeassemblies/hg19#chr11">http://rdf.biosemantics.org/data/genomeassemblies/hg19#chr11</a> | Skeletal Muscle Cells, donor6                                               | 1.92971  |
| 17741084  | 17741094 | <a href="http://rdf.biosemantics.org/data/genomeassemblies/hg19#chr11">http://rdf.biosemantics.org/data/genomeassemblies/hg19#chr11</a> | Skeletal Muscle Cells, donor1                                               | 8.41035  |
| 17741084  | 17741094 | <a href="http://rdf.biosemantics.org/data/genomeassemblies/hg19#chr11">http://rdf.biosemantics.org/data/genomeassemblies/hg19#chr11</a> | Skeletal muscle cells differentiated into Myotubes – multinucleated, donor1 | 5.07483  |
| 17741084  | 17741094 | <a href="http://rdf.biosemantics.org/data/genomeassemblies/hg19#chr11">http://rdf.biosemantics.org/data/genomeassemblies/hg19#chr11</a> | Skeletal Muscle Satellite Cells, donor1                                     | 0.322261 |
| 17741084  | 17741094 | <a href="http://rdf.biosemantics.org/data/genomeassemblies/hg19#chr11">http://rdf.biosemantics.org/data/genomeassemblies/hg19#chr11</a> | skeletal muscle, adult, pool1                                               | 4.82515  |
| 17741084  | 17741094 | <a href="http://rdf.biosemantics.org/data/genomeassemblies/hg19#chr11">http://rdf.biosemantics.org/data/genomeassemblies/hg19#chr11</a> | Skeletal Muscle Satellite Cells, donor2                                     | 1.01512  |
| 17741084  | 17741094 | <a href="http://rdf.biosemantics.org/data/genomeassemblies/hg19#chr11">http://rdf.biosemantics.org/data/genomeassemblies/hg19#chr11</a> | skeletal muscle – soleus muscle, donor1                                     | 1.94229  |
