# Supplementary material for: Gateways to the FANTOM5 promoter level mammalian expression atlas
Source: PubMed Central journal article supplement (PMC4310165; doi:10.1186/s13059-014-0560-6), 2015-01-05
Supplement: 13059_2014_560_MOESM23_ESM.pdf [file 13059_2014_560_MOESM23_ESM.pdf]

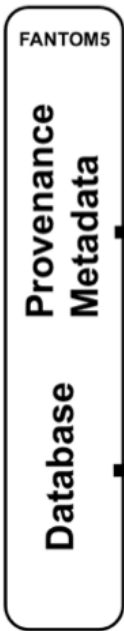

# Data to Nanopublication

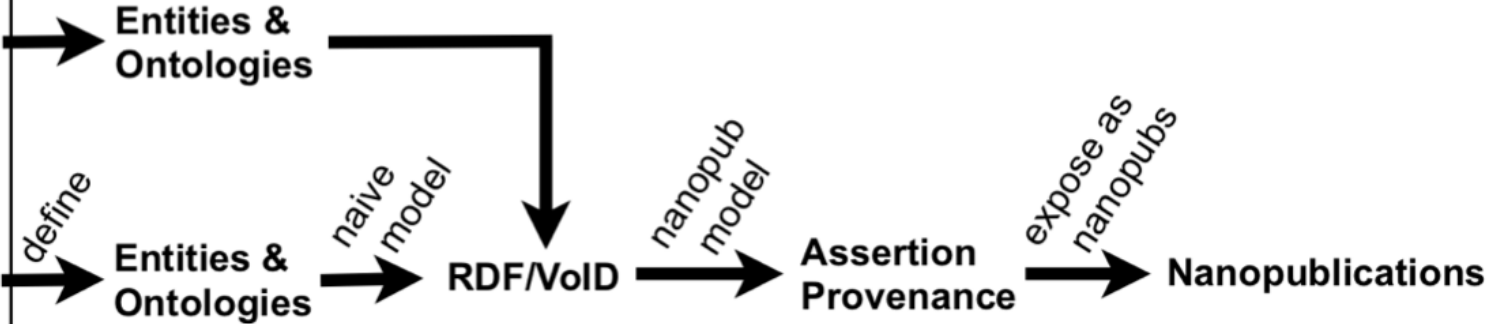

*Define* entities in the dataset and find / make appropriate ontologies to represent them.

Semantically *model* relations between entities using triples and named graphs, use VOID statements to attach provenance metadata

What is your assertion?  
Where does this come from?  
What is the evidence?

Individual datum as nanopublications. Building and linking triples and named graphs
